# Supplementary material for: Twitter users perceptions of AI-based e-learning technologies
Source: Springer Nature journal article supplement (doi:10.1038/s41598-024-56284-y), 2024-03-11
Supplement: 41598_2024_56284_MOESM2_ESM.pdf [file 41598_2024_56284_MOESM2_ESM.pdf]

**Figure S2.** LDAvis maps for the LDA topic model for 3 topic numbers. The model refers to tweets *with positive sentiment* and was obtained by selecting the threshold  $\lambda=1$ . Each of the three images below depicts the first 30 words for the selected topic (circle displayed in red) in the image.

Selected Topic:

Slide to adjust relevance metric:<sup>(2)</sup>   $\lambda = 1$

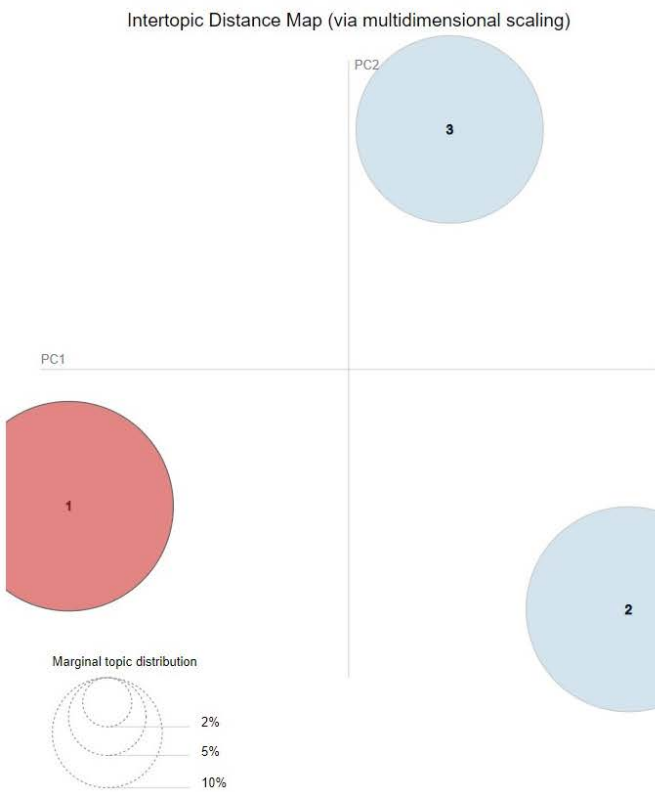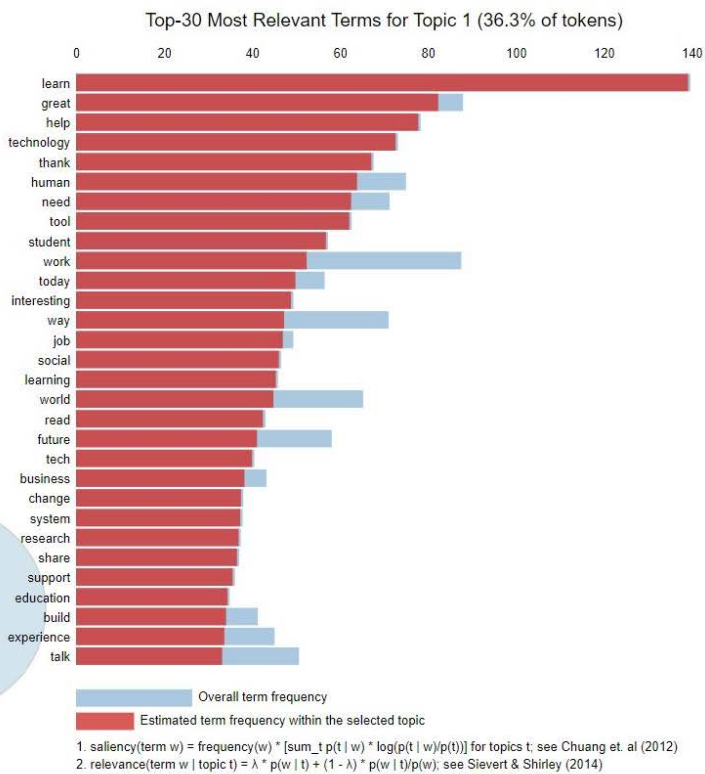

Selected Topic:

Slide to adjust relevance metric:<sup>(2)</sup>   $\lambda = 1$

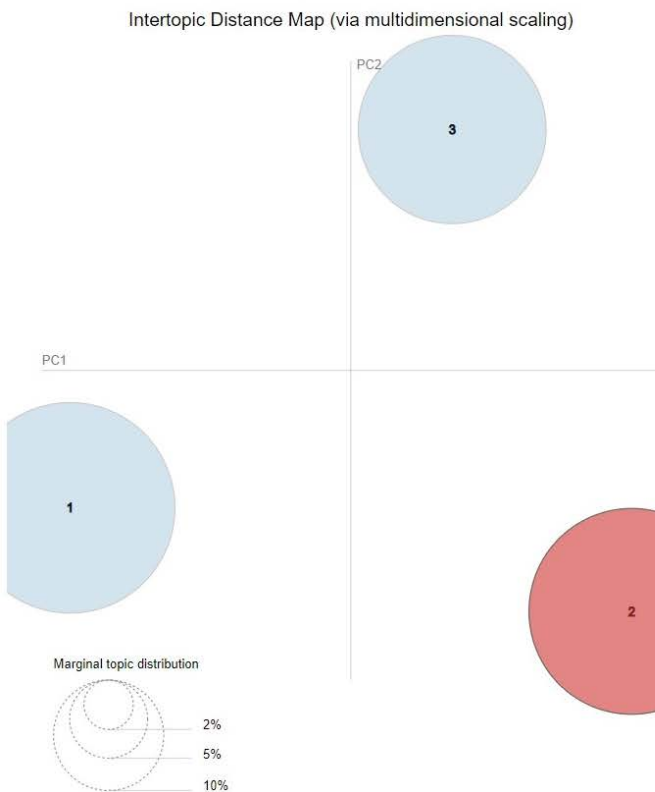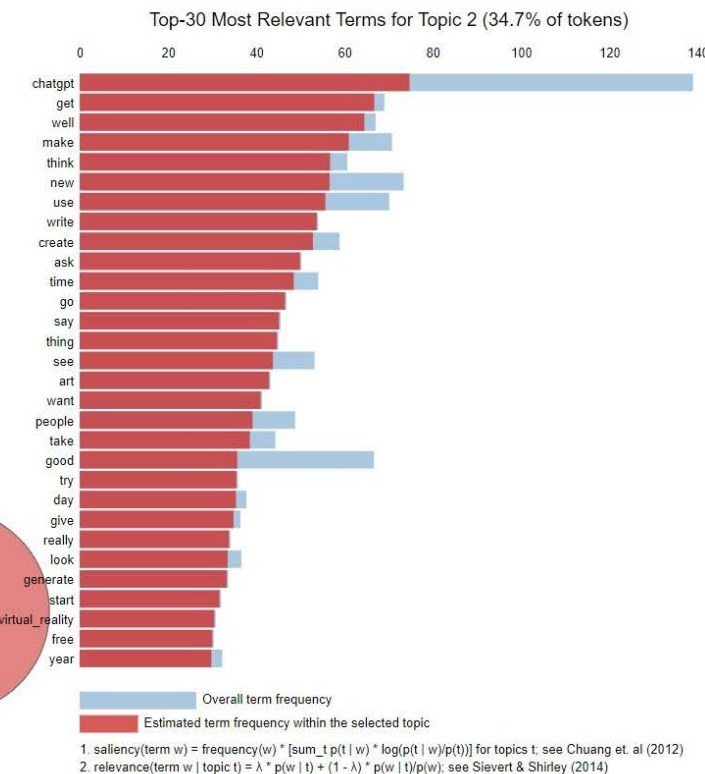

Selected Topic:

Slide to adjust relevance metric:<sup>(2)</sup>    
  $\lambda = 1$

Intertopic Distance Map (via multidimensional scaling)

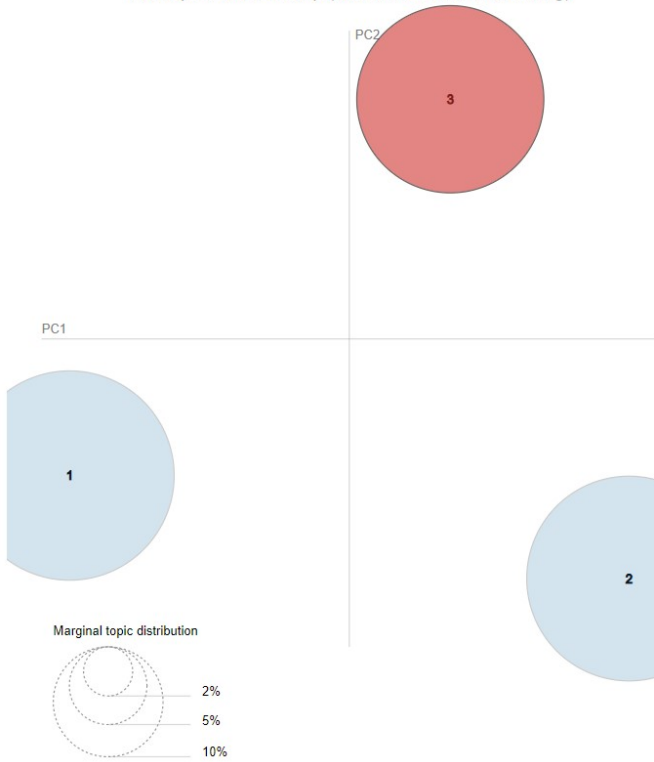

Top-30 Most Relevant Terms for Topic 3 (29% of tokens)

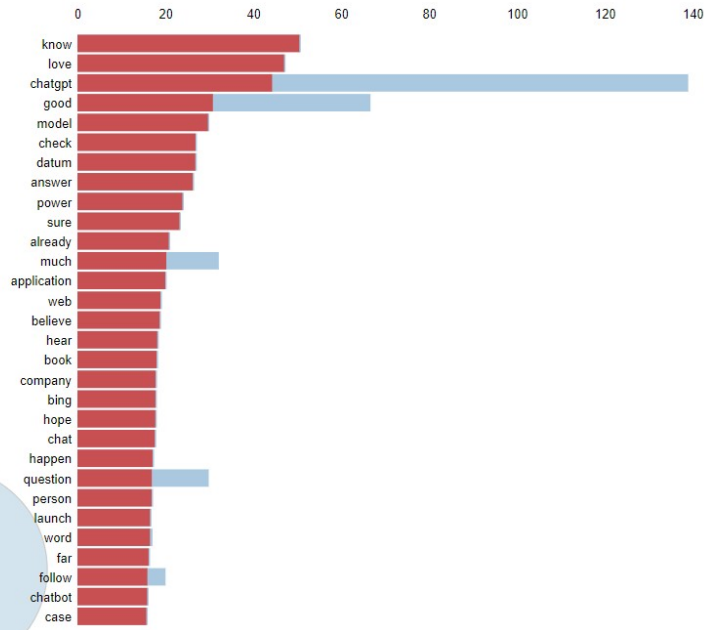

Overall term frequency (blue bar)  
 Estimated term frequency within the selected topic (red bar)

1. saliency(term w) = frequency(w) \* [sum\_t p(t | w) \* log(p(t | w)/p(t))] for topics t; see Chuang et. al (2012)  
 2. relevance(term w | topic t) =  $\lambda * p(w | t) + (1 - \lambda) * p(w | t)/p(w)$ ; see Sievert & Shirley (2014)
