# Supplementary material for: Twitter users perceptions of AI-based e-learning technologies
Source: Springer Nature journal article supplement (doi:10.1038/s41598-024-56284-y), 2024-03-11

**Figure S3.** LDAvis map for LDA topic model for 5 topic numbers. The model refers to tweets with *positive sentiment*. As can be seen from the figure below, topics 2, 3, and 5 tend to overlap and cause some interpretation difficulties.

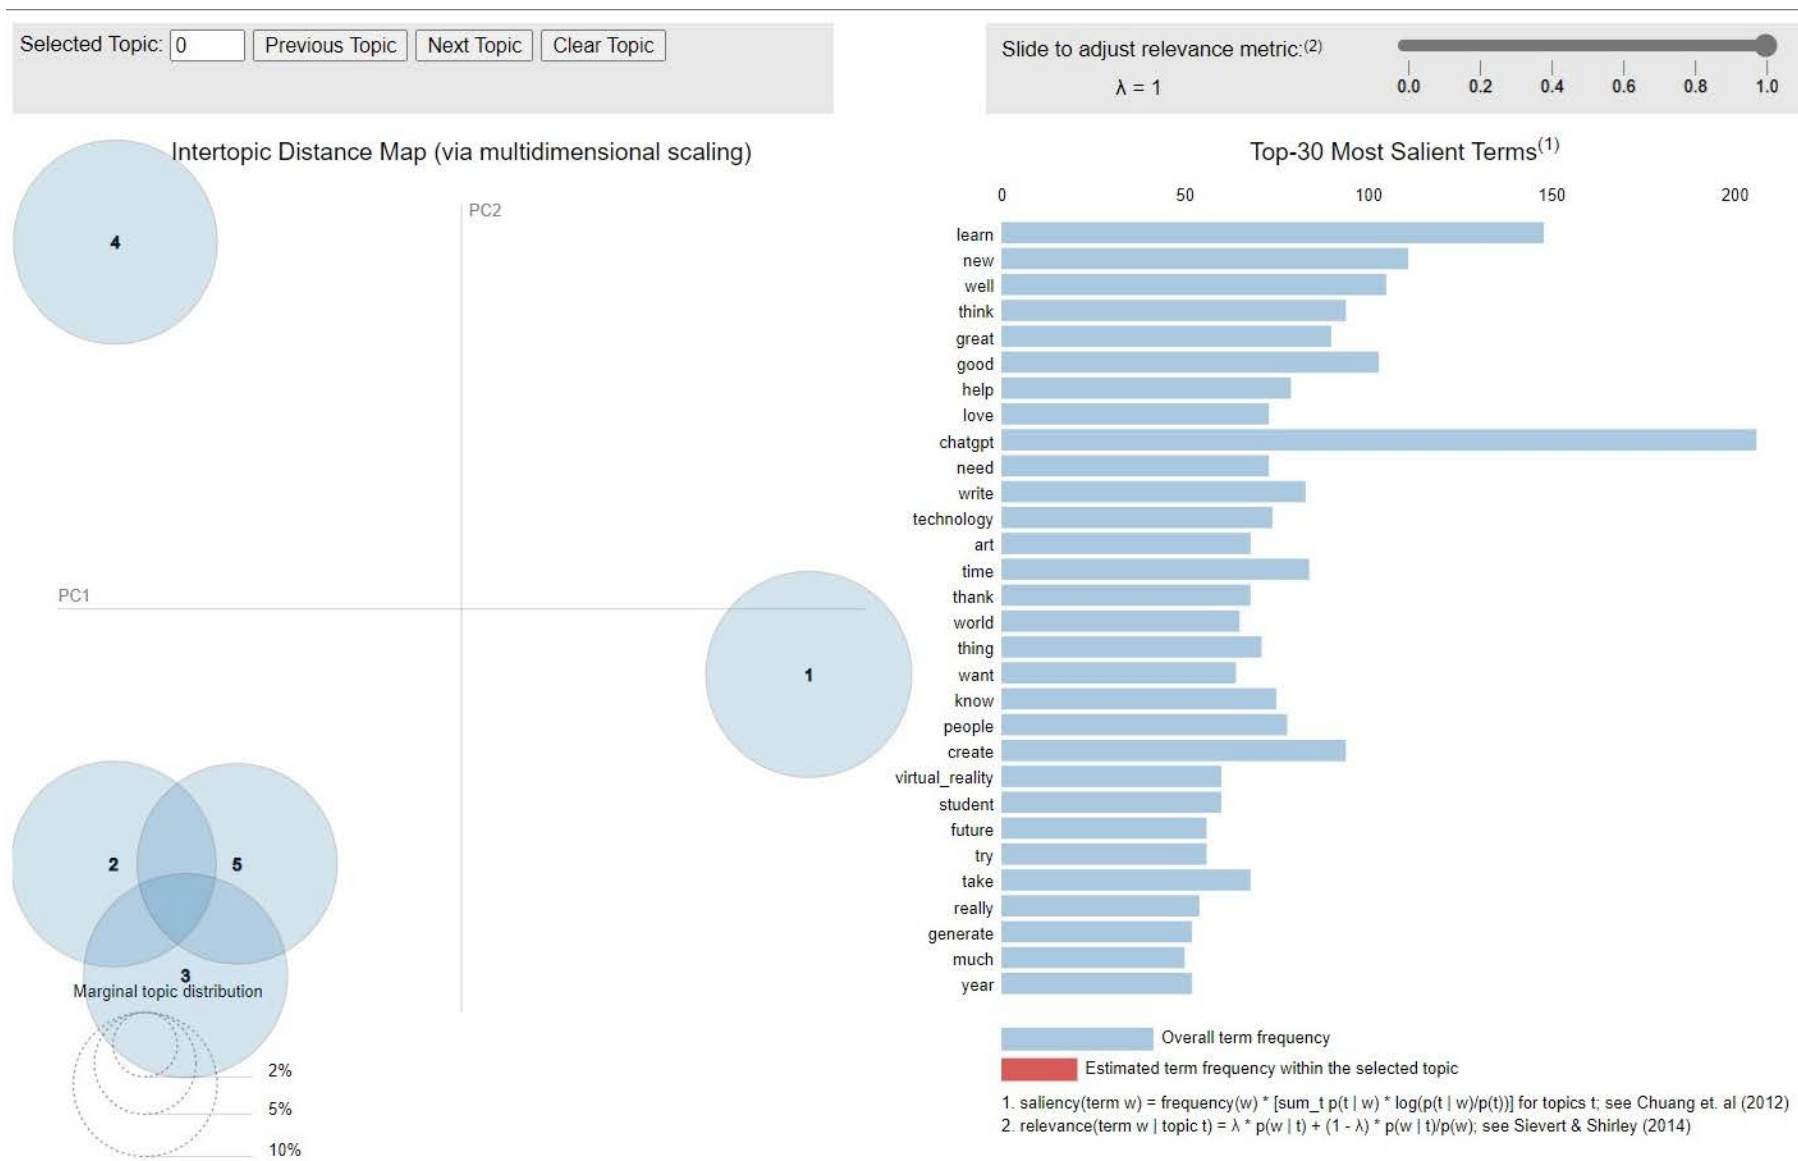

Supplement: 41598_2024_56284_MOESM3_ESM.pdf [file 41598_2024_56284_MOESM3_ESM.pdf]
